# Supplementary material for: Identification of NDUFAF1 in mediating K-Ras induced mitochondrial dysfunction by a proteomic screening approach
Source: PubMed Central journal article supplement (PMC4414165; doi:10.18632/oncotarget.2968), 2015-02-27
Supplement: oncotarget-06-3947-s001.pdf [file oncotarget-06-3947-s001.pdf]

## SUPPLEMENTAL METHODS

### Blue-native Polyacrylamide Gel Electrophoresis (BN-PAGE)

BN-PAGE was performed using a Novex Native PAGE Bis-Tris Gel System (Life Technologies, USA) following manufacturer's instructions. Briefly, mitochondria were isolated, purified and re-suspended in 30  $\mu$ l of 1  $\times$  Native PAGE Sample buffer (Life Technologies, USA) with 1% digitonin and protease inhibitors (Roche, USA). After centrifuge at 20,000 g for 30 min, 30  $\mu$ l of the supernatant was re-suspended with 1  $\mu$ l of 5% G250 sample additive (Life Technologies, USA). 40  $\mu$ g of mitochondria proteins were loaded on 3–12% Bis-Tris Native PAGE gels. Native unstained protein standard (Life Technologies, USA) was used as molecular weight marker. Protein concentrations of mitochondria was determined by BCA assay (Thermo Scientific, USA).

### Measurement of oxygen consumption rate (OCR) by Seahorse XF24

Briefly, cells were plated into XF24 cell culture plates (Seahorse Bioscience, North Billerica) and cultured overnight prior to OCR analysis. T-Rex293 cells before and after K-Ras activation for 24 hrs were seeded at 40,000/well in complete media. The next day, the complete media was replaced with 600  $\mu$ l Seahorse assay medium (25 mmol/L glucose, 1 mmol/L sodium pyruvate) and cells were cultured at 37°C without CO<sub>2</sub> for 1 h. The key parameters of mitochondrial function were directly measured by The XF Cell Mito Stress Test (Seahorse). The compounds (oligomycin, FCCP, and a mix of rotenone and antimycin A) are serially injected to measure ATP production, maximal respiration, and non-mitochondrial respiration, respectively.

## SUPPLEMENTARY FIGURES

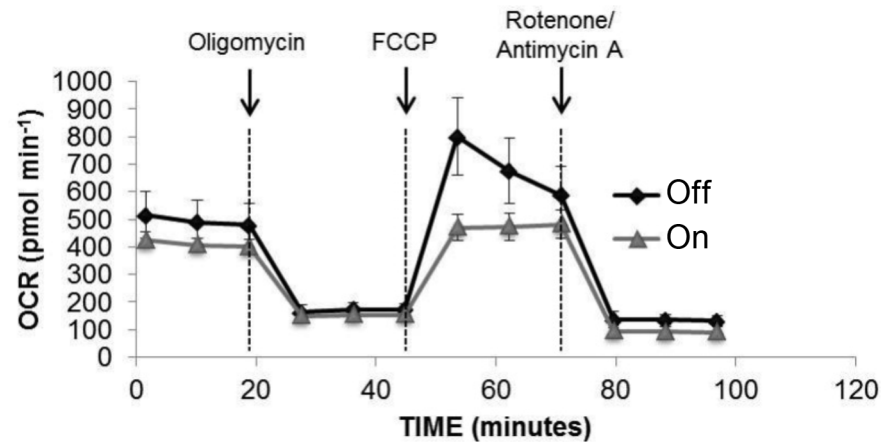

**Supplementary Figure 1: Kinetic OCR (oxygen consumption rate) of T-Rex-293 before (Off) and after induction of K-Ras for 48 hrs (On) was analyzed by Seahorse XF analyzer.** Oligomycin (1  $\mu$ M), FCCP (0.5  $\mu$ M) and Rotenone (1  $\mu$ M)/Antimycin A (1  $\mu$ M) mix were serially injected to measure ATP production, maximal respiration, and non-mitochondrial respiration, respectively. T-Rex-293 off and on (induction for 48 h) cells were plated at 40,000 cells/well 24 hours prior to the assay. Each data point represents mean  $\pm$  SD,  $n = 3$ .

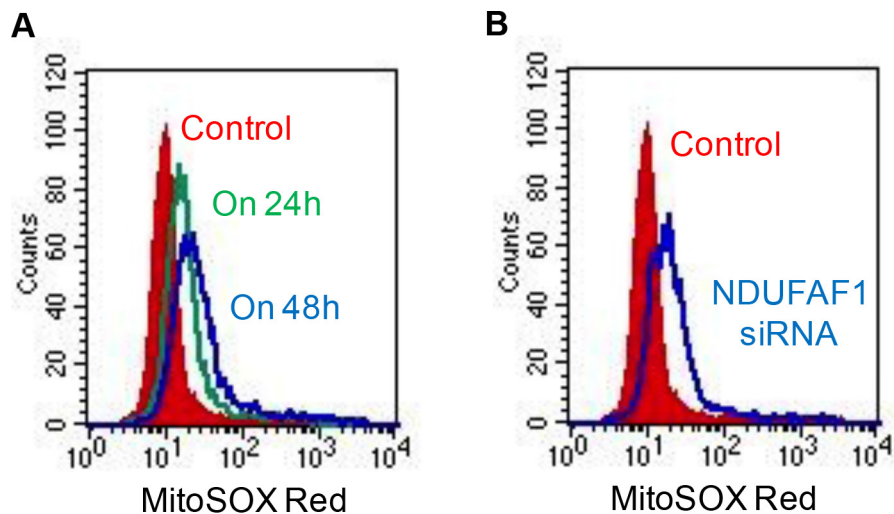

**Supplementary Figure 2: Intracellular superoxide generation detected by MitoSOX Red.** (A) Increase of superoxide generation after K-Ras activation for 24 and 48 hrs. (B) Increase of superoxide generation after knockdown of NDUFAF1 by siRNA.

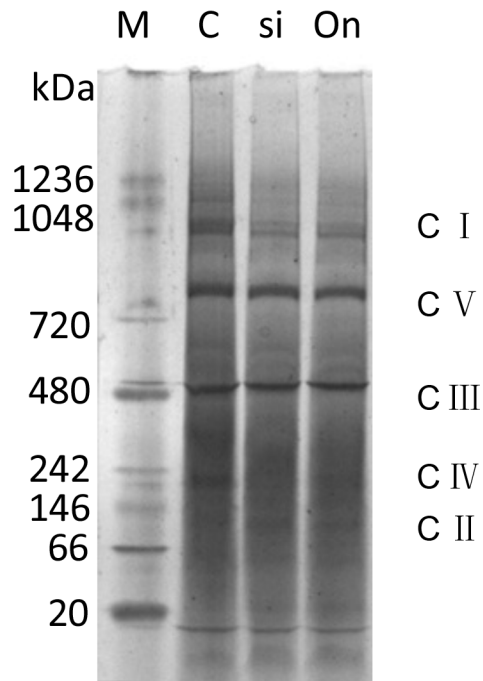

**Supplementary Figure 3: BN-PAGE showing assembly of mitochondrial respiratory chain complex of T-ReX293 cells before and after K-Ras activation and knockdown of NDUFAF1 by siRNA.** M, molecular marker. C, control cells. Si, NDUFAF1 by siRNA. On, induction of K-Ras by doxycycline for 48 hrs. CI-V, complex I to complex V.
